# Supplementary material
Source: Elsevier journal article supplement (https://www.sciencedirect.com/science/article/pii/S0211139X16301585)
Supplement: mmc1 [file S0211139X16301585:mmc1.docx]

| Reviewer #3: Consideraciones | Respuestas de los autores |
| --- | --- |
| El artículo ha mejorado considerablemente tras las modificaciones efectuadas por los autores a sugerencia de los revisores. Los autores han contestado correctamente los comentarios del revisor, pero quedan todavía dos cuestiones: | Muchas gracias |
| Dado que el estudio ya ha sido realizado, los autores deben utilizar el "pasado" (tiempo verbal) en la redacción del manuscrito, especialmente en aquel1os apartados que tratan sobre los hallazgos del estudio. | Se ha repasado la gramática y se ha procedido a cambiar los tiempos verbales |
| La segunda cuestión hace referencia a que es bien conocido que el índice de masa corporal se relaciona con los restantes parámetros antropométricos. Por dicho motivo, y para dar mayor consistencia a los resultados obtenidos en el presente estudio, deberían corregirse los parámetros antropométricos evaluados por el valor del índice de masa corporal utilizando el análisis estadístico apropiado. | Se ha procedido al estudio de asociación entre variables mediante correlaciones parciales, controladas por el IMC  Se ha modificado la tabla 3 completamente, con nuevos coeficientes de correlación, asi como el texto correspondiente en el apartado de resultados  Se ha completado alguna frase en la discusión |
